# Supplementary material for: Cross-Linked Hyaluronan Derivatives in the Delivery of Phycocyanin
Source: MDPI journal article supplement (doi:10.3390/gels10020091), 2024-01-25
Supplement: s1 [file s1]

**Contents:**

|                                                                                       |        |
|---------------------------------------------------------------------------------------|--------|
| <sup>1</sup> H NMR spectrum of the crosslinked material <b>HA(270)-FA-TEGEC-CL-10</b> | page 2 |
| <sup>1</sup> H NMR spectrum of the crosslinked material <b>HA(270)-FA-HEGEC-CL-10</b> | page 3 |
| <sup>1</sup> H NMR spectrum of the crosslinked material <b>HA(270)-FA-HEGEC-CL-40</b> | page 4 |
| Table of Z-average, PDI, and zeta-potential of all the crosslinked materials obtained | page 5 |

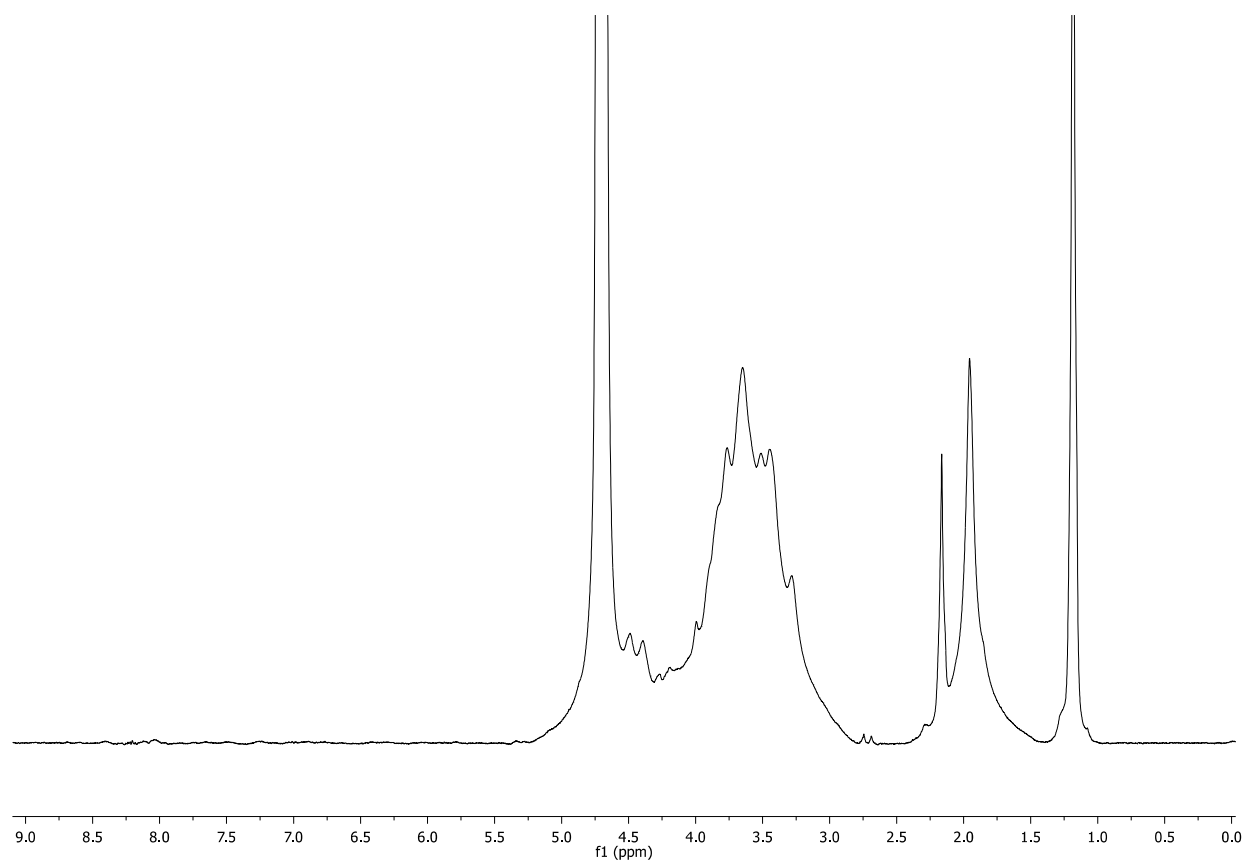

**Figure S1.**  $^1\text{H}$  NMR ( $\text{D}_2\text{O}$ , 600 MHz) spectrum of the crosslinked material **HA(270)-FA-TEGEC-CL-10**.

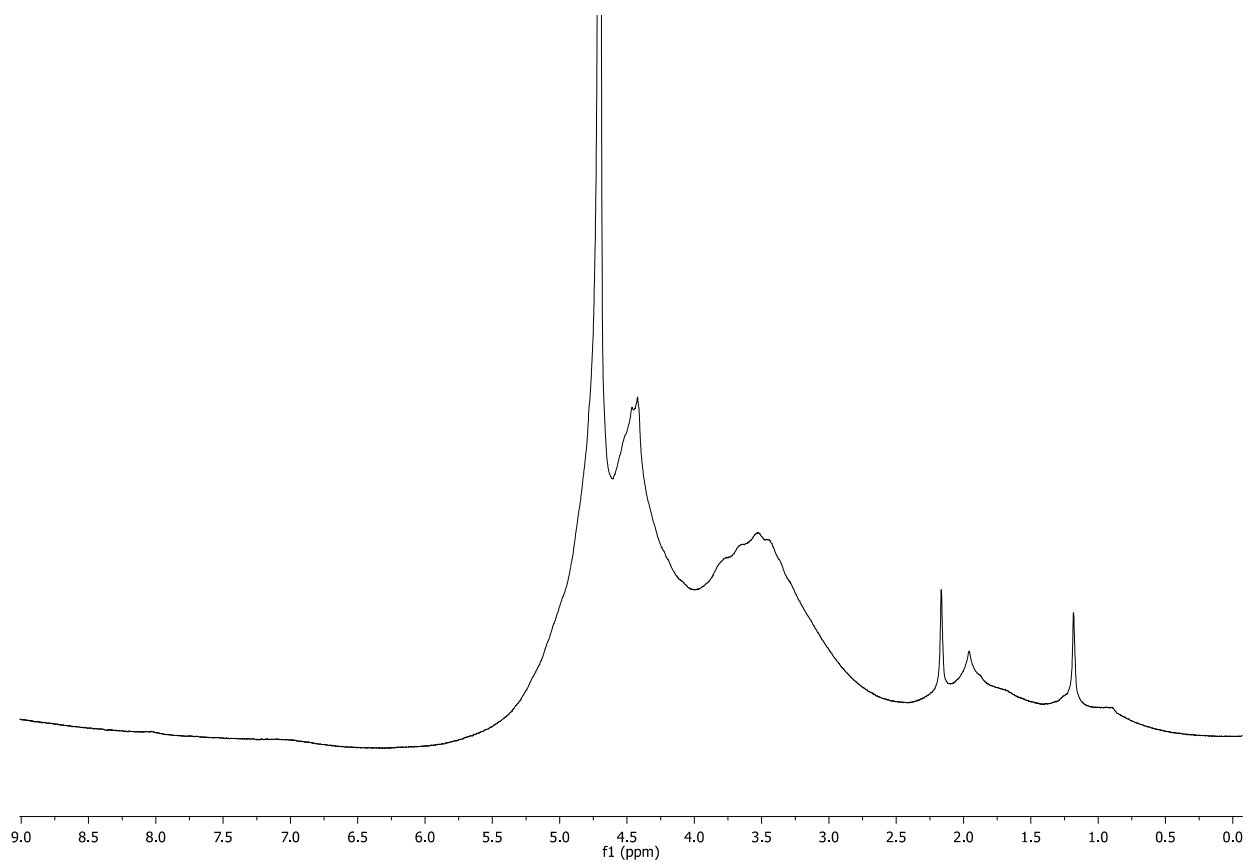

**Figure S2.**  $^1\text{H}$  NMR ( $\text{D}_2\text{O}$ , 600 MHz) spectrum of the crosslinked material **HA(270)-FA-HEGEC-CL-10**.

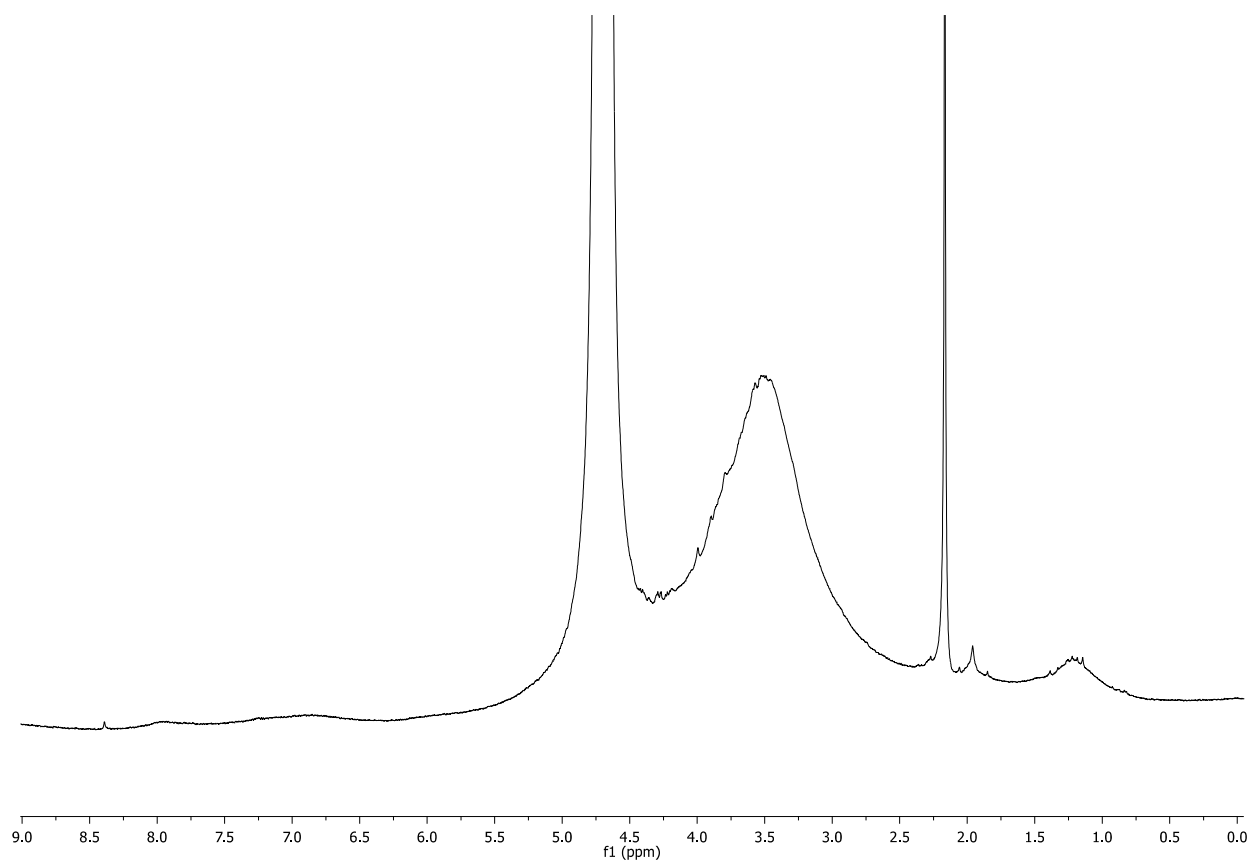

**Figure S3.**  $^1\text{H}$  NMR ( $\text{D}_2\text{O}$ , 600 MHz) spectrum of the crosslinked material **HA(270)-FA-HEGEC-CL-40**.

**Table S1.** Z-average, PDI, and zeta-potential, of all the crosslinked materials produced (**HA(270)-FA-TEGEC-CL-10**, **HA(270)-FA-TEGEC-CL-20**, **HA(270)-FA-TEGEC-CL-40**, **HA(270)-FA-HEGEC-CL-10**, **HA(270)-FA-HEGEC-CL-20**, and **HA(270)-FA-HEGEC-CL-40**).

| Sample                        | Z- average (nm)  | PDI               | Zeta potential (mV) |
|-------------------------------|------------------|-------------------|---------------------|
| <b>HA(270)-FA-TEGEC-CL-10</b> | $226.8 \pm 15.8$ | $0.312 \pm 0.015$ | $-41.4 \pm 0.4$     |
| <b>HA(270)-FA-TEGEC-CL-20</b> | $332.5 \pm 22.6$ | $0.338 \pm 0.012$ | $-39.1 \pm 0.7$     |
| <b>HA(270)-FA-TEGEC-CL-40</b> | $354.8 \pm 25.8$ | $0.456 \pm 0.013$ | $-35.8 \pm 0.5$     |
| <b>HA(270)-FA-HEGEC-CL-10</b> | $610.4 \pm 19.5$ | $0.240 \pm 0.016$ | $-41.6 \pm 0.3$     |
| <b>HA(270)-FA-HEGEC-CL-20</b> | $348.6 \pm 18.4$ | $0.279 \pm 0.015$ | $-41.5 \pm 0.5$     |
| <b>HA(270)-FA-HEGEC-CL-40</b> | $205.9 \pm 28.7$ | $0.247 \pm 0.018$ | $-36.5 \pm 0.8$     |
